# Radiation-induced cognitive impairment—from bench to bedside

Dana Greene-Schloesser and Mike E. Robbins

Department of Radiation Oncology (D.G.-S., M.E.R.); Brain Tumor Center of Excellence, Wake Forest School of Medicine, Winston-Salem, North Carolina (D.G.-S., M.E.R.)

Approximately 100 000 patients per year in the United States with primary and metastatic brain tumor survive long enough (>6 months) to develop radiation-induced brain injury. Before 1970, the human brain was thought to be radioresistant; the acute central nervous system (CNS) syndrome occurs after single doses of  $\geq 30$  Gy, and white matter necrosis can occur at fractionated doses of  $\geq 60$  Gy. Although white matter necrosis is uncommon with modern radiation therapy techniques, functional deficits, including progressive impairments in memory, attention, and executive function have become increasingly important, having profound effects on quality of life. Preclinical studies have provided valuable insights into the pathogenic mechanisms involved in radiation-induced cognitive impairment. Although reductions in hippocampal neurogenesis and hippocampal-dependent cognitive function have been observed in rodent models, it is important to recognize that other brain regions are affected; non-hippocampal-dependent reductions in cognitive function occur. Neuroinflammation is viewed as playing a major role in radiation-induced cognitive impairment. During the past 5 years, several preclinical studies have demonstrated that interventional therapies aimed at modulating neuroinflammation can prevent/ameliorate radiation-induced cognitive impairment independent of changes in neurogenesis. Translating these exciting preclinical findings to the clinic offers the promise of improving the quality of life in patients with brain tumors who receive radiation therapy.

**Keywords:** inflammation, neurogenesis, peroxisomal proliferator-receptor agonist, radiation-induced cognitive impairment, renin-angiotensin system.

## Radiation-Induced Cognitive Impairment

**O**ur view of the radiation response of the brain has evolved considerably over the past few decades as preclinical and clinical knowledge

Corresponding Author: Mike E. Robbins, PhD, Department of Radiation Oncology, Wake Forest School of Medicine, Room 412C NRC, Mail Box # 571059, Medical Center Blvd, Winston-Salem, NC 27157 (mrobbins@wakehealth.edu).

has been acquired. Prior to 1970, the human brain was thought to be radioresistant, with acute central nervous system (CNS) syndrome occurring after single doses >30 Gy and white matter necrosis occurring at fractionated doses >60 Gy. During the 1980s–1990s, late radiation-induced brain injury, characterized by vascular abnormalities, demyelination, and ultimately white matter necrosis, was recognized as a dose-limiting morbidity evident >6 months after irradiation.<sup>1</sup> Extensive preclinical studies in rodents revealed dose-dependent changes in these histopathological lesions.<sup>1,2</sup> Classically, late radiation-induced brain injury was viewed as solely attributable to a reduction in the proliferative capacity of glial<sup>3</sup> or vascular endothelial<sup>2</sup> cells. Of importance, these late effects were viewed as progressive and irreversible. In recent years, there has been a growing appreciation that patients receiving fractionated partial or whole-brain irradiation (fWBI) can develop significant cognitive impairment at >6 months after irradiation, even in the absence of detectable anatomic abnormalities. Thus, current efforts investigating radiation-induced brain injury are focused on the functional consequences of brain irradiation.

Radiation-induced cognitive impairment in some series is reported to occur in up to 50%–90% of adult patients with brain tumor who survive >6 months after fWBI.<sup>4–7</sup> Moreover, because patients with brain tumor are surviving longer because of improved radiation therapy techniques and systemic therapies,<sup>8,9</sup> the patient population experiencing these significant late effects is growing rapidly. Radiation-induced cognitive impairment is marked by decreased verbal memory, spatial memory, attention, and novel problem-solving ability,<sup>10–13</sup> with incidence and severity increasing over time.<sup>14</sup> Rarely after focal radiotherapy and in up to 1.9%–5.1% of long-term survivors after whole-brain radiotherapy,<sup>15</sup> this cognitive impairment progresses to dementia, in which patients experience progressive memory loss, ataxia, and urinary incontinence.<sup>16</sup> As noted previously, all of these late sequelae can be seen in the absence of radiographic or clinical evidence of demyelination or white matter necrosis.<sup>17,18</sup>

Radiation-induced cognitive impairment has significant effects on quality of life (QOL), and this diminished QOL has become an important and growing concern, being recognized as one of the most important measurements of brain tumor therapy outcomes, second only to survival in clinical trials.<sup>19</sup> Although short-term interventions have proved to be effective,<sup>20</sup> there are no proven successful long-term treatments or effective preventative strategies for radiation-induced cognitive impairment. Thus, the search for therapeutic strategies to prevent/ameliorate radiation-induced cognitive impairment has become very important.

## Pathogenesis of Radiation-Induced Cognitive Impairment

Preclinical studies have provided valuable insights into the pathogenic mechanisms involved in radiation-induced cognitive impairment. Numerous studies conducted over the past ~20 years have clearly demonstrated that the classic dogma that radiation-induced late effects arise simply from mitotic cell death of particular target cell clonogens is no longer tenable. Radiation-induced late effects are now believed to reflect complex and dynamic interactions between multiple cell types within an organ.<sup>21</sup> In the brain, radiation-induced late effects, including cognitive impairment, are hypothesized to occur because of dynamic interactions between the multiple cell types within the brain,<sup>22</sup> including astrocytes, endothelial cells, microglia, neurons, and oligodendrocytes. An additional and important component of radiation injury to the brain is the relatively recent observation that irradiation can inhibit hippocampal neurogenesis.

### Neurogenesis

In rodents, the hippocampus plays a major role in learning, consolidation, and retrieval of information.<sup>23,24</sup> Consequently, most rodent studies have focused on the hippocampus to investigate radiation-induced brain injury. The hippocampus consists of the dentate gyrus (DG), CA3, and CA1 regions; these regions have been implicated in both rodent and human cognition. In addition, the DG is 1 of the 2 sites of adult neurogenesis in the mammalian brain. Neuronal stem cells (NSCs) in the DG are capable of both self-renewal and generating neurons, astrocytes, and oligodendrocytes.<sup>25–27</sup> Neurogenesis depends on the presence of a specific neurogenic microenvironment in which endothelial cells and astrocytes can promote/regulate neurogenesis.<sup>28,29</sup> Irradiating the hippocampus has been shown to result in a dose-dependent loss of NSCs,<sup>30</sup> decreased proliferation of the surviving NSC, and decreased NSC differentiation into neurons.<sup>31–33</sup> Young adult rats irradiated with a single dose of 10 Gy, a dose that fails to cause demyelination or white matter necrosis, produced only 3% of the new hippocampal neurons formed in unirradiated rats.<sup>32</sup> In contrast to neurogenesis, gliogenesis appears to be preserved following irradiation.<sup>33</sup> Of

interest, all these phenomena can be observed after doses of  $\leq 2$  Gy that fail to produce demyelination and/or white matter necrosis. Recent data from human patients indicate that radiation therapy for malignant brain tumors may also lead to a significant reduction in the number of neurogenic cells.<sup>34</sup>

These reductions in hippocampal neurogenesis have been implicated in radiation-induced cognitive impairment. Whole-brain irradiation (WBI) of the mouse and rat brain leads to a significant decrease in the number of newborn mature and immature neurons in the DG<sup>32,35,36</sup> and has been associated with impairments in hippocampal-dependent spatial learning and memory 3 months after WBI with a single 5 Gy dose in 21-day-old mice.<sup>35</sup> When young adult mice received 10 Gy of focal irradiation to the hippocampus, a significant decrease in neurogenesis and cell proliferation was detected 3 months after irradiation; this reduction correlated with a decline in cognitive function as assessed by the Barnes maze.<sup>36</sup> Similarly, both a reduction in neurogenesis and cognitive impairment has been observed in young adult rats after fWBI.<sup>37–39</sup> However, it should be noted that older rats fail to show a radiation-induced decrease in neurogenesis<sup>40</sup> but still exhibit cognitive impairment.<sup>41</sup>

It is important to recognize that the hippocampus is not the only domain that appears important in radiation-induced cognitive impairment. Using a recently characterized young adult rat model,<sup>42</sup> Robbins et al applied the perirhinal cortex-dependent novel object recognition task to assess recognition memory. As seen clinically, fWBI (40 Gy given in 5 Gy fractions, twice per week for 4 weeks to young adult male rats) leads to a chronic, progressive cognitive impairment that is statistically significant 6 months after fWBI and worsens over the next 6 months (Fig. 1).<sup>43</sup> Thus, fWBI leads to significant and progressive reductions in both

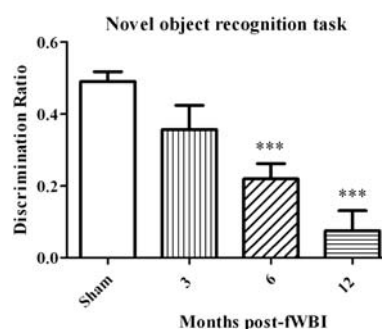

Fig. 1. Development of radiation-induced cognitive impairment as a function of time after young adult male Fischer 344 X Brown Norway rats were irradiated with a total 40 Gy dose of fractionated whole-brain irradiation (fWBI) delivered in 5 Gy fractions, twice/week for 4 weeks. Cognition was assessed using the novel object recognition (NOR) task. The sham-irradiated group value is the average of the NOR scores from unirradiated rats at all of the time points. In this rat model, cognitive impairment is both progressive and not significantly different from sham-irradiated rats until ~6 months after fWBI, similar to what is observed in the clinic. \*\*\* $P < 0.001$ .

hippocampal- and non-hippocampal-dependent cognitive function, indicating that that multiple regions of the brain, and not simply the hippocampus, are involved.

### Neuroinflammation

In addition to the significant reductions in neurogenesis, previous studies have also shown a correlation with an increase in the number of activated microglia, the immune cells of the brain, following brain irradiation. Although microglial activation plays an important role in phagocytosis of dead cells, sustained activation is thought to contribute to a chronic inflammatory state in the brain.<sup>44</sup> Rodent studies and analysis of human brain tissue suggest that microglial activation may be associated with decreased hippocampal neurogenesis and decreased cognitive function.<sup>32,34,36</sup> Administration of the anti-inflammatory agent indomethacin reduced the number of activated microglia in the hippocampus and prevented radiation-induced cognitive impairment in rodents.<sup>45</sup>

Although the majority of preclinical studies have focused on the hippocampus and particularly the radiation-induced decrease in neurogenesis, it should be noted that multiple mechanisms are likely to be involved in radiation-induced cognitive impairment. Putative mechanisms include, (i) alterations in NMDA receptor subunit composition,<sup>39</sup> (ii) disrupted Arc expression in hippocampal neurons,<sup>46</sup> (iii) genetic risk factors,<sup>36</sup> and (iv) oxidative stress/neuroinflammation.<sup>47</sup> The latter appears to be particularly important.

A preponderance of evidence supports the hypothesis that late radiation-induced brain injury, including cognitive impairment, is driven by acute and chronic oxidative stress and inflammatory responses.<sup>47,48</sup> In general, ionizing radiation produces its biological effects by, either directly or indirectly, generating reactive oxygen species (ROS), leading to molecular changes; damage to DNA, lipids, and proteins; and activation of early response transcription factors and signal transduction pathways.<sup>49</sup> Activation of these pathways leads to the induction of reparative and restorative processes; changes in cytokine milieu; the activation/influx of inflammatory cells, particularly microglia; and the development of postirradiation complications. Evidence for a chronic inflammatory response to WBI and fWBI in rodent models include region-specific elevation of inflammatory and chemotactic cytokines in the mouse brain 6–9 months after irradiation<sup>50–52</sup> and persistent microglial activation in the rat brain up to 12 months after irradiation.<sup>40,53</sup>

## Therapeutic Interventions for Radiation-Induced Cognitive Impairment

### Stem Cell Therapies

There is a growing interest in the use of various stem cell therapies to restore the neurogenic niche and improve cognition. These studies are based on the rationale that

radiation results in a dramatic reduction in hippocampal neurogenesis that has been linked to cognitive impairment.<sup>35,36</sup> Voluntary running has been shown to increase neurogenesis in the rodent hippocampus, with a concomitant improvement in spatial learning and memory after single WBI doses.<sup>54,55</sup> Direct injection of NSCs into rodent brains after WBI partially restores neurogenesis and hippocampal-dependent cognitive function.<sup>56,57</sup> However, these studies involved injecting NSCs into immunodeficient rats; previous studies by Monje et al.<sup>32,45</sup> noted that inflammation impairs the neurogenic environment, because transplanted syngeneic NSCs cannot produce neurons. Thus, the use of exercise or NSC transplantation to prevent/ameliorate radiation-induced cognitive impairment in humans will require considerably more research before it can be translated to the clinic.

### Drug-Based Approaches

Although the exact mechanism(s) of radiation-induced brain injury, including cognitive impairment, is unclear, the relative wealth of experimental data supporting a major role for inflammation suggests that use of anti-inflammatory-based approaches would be of benefit. Rather than attempt to develop novel agents, a process that would likely take several years and ultimately prove to be unsuccessful, we have focused on using drugs that have already received US Food and Drug Administration approval and have been used successfully for a number of years in the clinic. These drugs include peroxisomal proliferator-activated receptor (PPAR) agonists and blockers of the renin-angiotensin system (RAS).

### PPAR Agonists

PPARs are ligand-activated transcription factors that belong to the steroid/thyroid hormone superfamily of nuclear receptors.<sup>58</sup> To date, 3 PPAR isotypes have been identified: PPAR $\alpha$  (NR1C1), PPAR $\delta$  (NR1C2), and PPAR $\gamma$  (NR1C3). A growing body of evidence suggests that PPARs regulate inflammatory signaling and are neuroprotective in a variety of CNS diseases.<sup>59–61</sup> Initial studies focused on the PPAR $\gamma$  agonist pioglitazone, a member of the thiazolidinedione class of insulin-sensitizing drugs used for a number of years in the treatment of type II diabetes<sup>62</sup> and effective in the treatment of a variety of brain disorders.<sup>63</sup> Administering the PPAR $\gamma$  agonist, pioglitazone (120 ppm), in the diet of young adult male rats starting 3 days prior to, during, and for 54 weeks after the completion of a total 40 Gy dose of fWBI delivered twice a week for 4 weeks prevented the radiation-induced perirhinal cortex-dependent cognitive impairment measured 52 weeks after fWBI (Fig. 2A).<sup>64</sup> Administering pioglitazone before, during, and for only 4 weeks after fWBI similarly prevented the radiation-induced decrease in cognitive function, suggesting that continued administration of the drug during the 1-year follow-up period

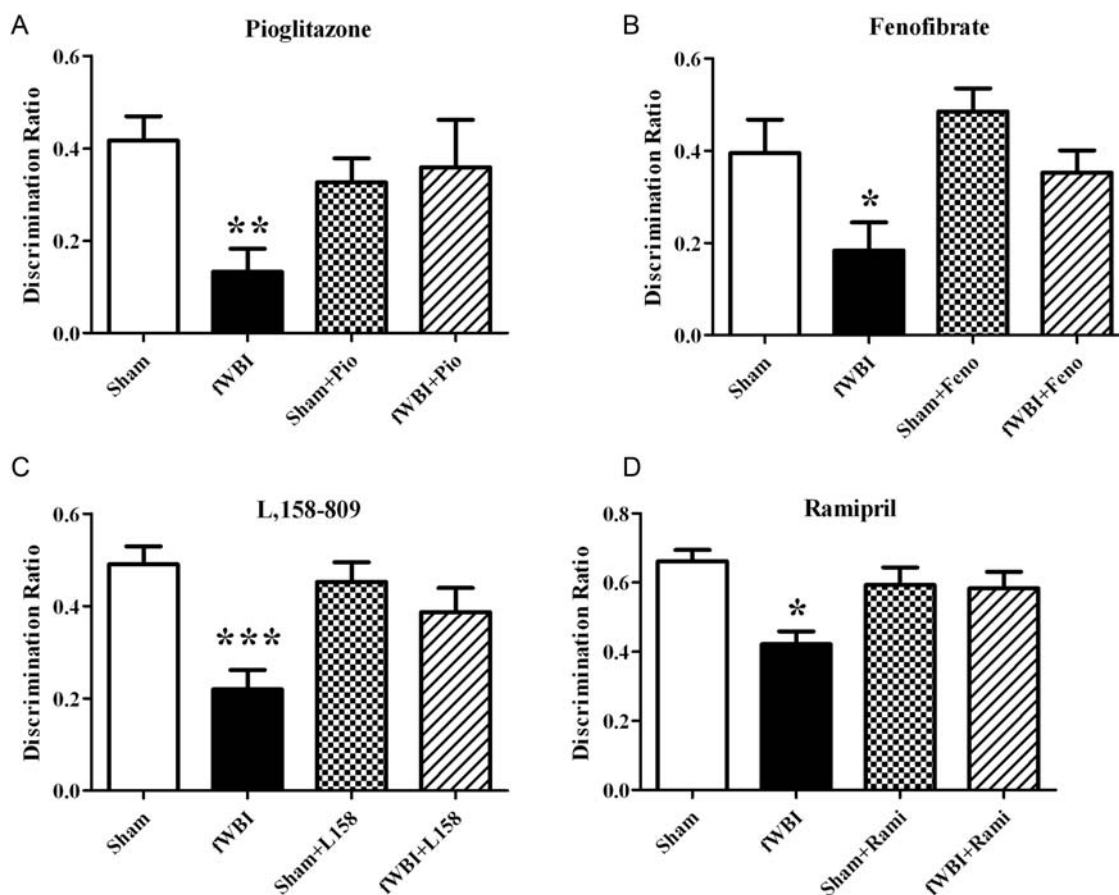

Fig. 2. Both PPAR agonists and RAS inhibitors prevent radiation-induced cognitive impairment in young adult male rats that received a total 40 Gy dose of fractionated whole-brain irradiation (fWBI) delivered in 5 Gy fractions, twice/week for 4 weeks, and then tested for cognition at 6–12 months postirradiation using the NOR task. Rats were administered, A, the PPAR $\gamma$  agonist, pioglitazone, before, during, and for 54 weeks post-fWBI; tested at 52 weeks; (B) the PPAR $\alpha$  agonist, fenofibrate, before, during, and for 29 weeks post-fWBI; tested at 26 weeks; (C) the ARB, L158,809, before, during, and for 54 weeks post-fWBI; tested at 52 weeks; and (D) the ACEI, ramipril, before, during, and for 28 weeks post-fWBI; tested at 26 weeks. \* $P < .05$ , \*\* $P < .01$ , \*\*\* $P < .001$  compared to sham-irradiated rats.

was not required.<sup>64</sup> Finally, administering pioglitazone starting the day after the completion of fWBI and for 54 weeks failed to prevent the radiation-induced decrease in cognitive function, suggesting that pioglitazone-mediated prevention of radiation-induced cognitive impairment depends on the drug being administered both during and after the fWBI regimen.<sup>64</sup> The need to administer the PPAR $\gamma$  agonist during fWBI raises concerns as whether the drug will also protect tumor cells against radiation damage. These concerns appear to be unfounded; PPAR $\gamma$  agonists, including pioglitazone, have been shown to induce anti-neoplastic signaling pathways in a variety of cancer cell lines, animal models, and human beings and are selectively cytotoxic to tumor cells.<sup>65</sup>

Additional studies have focused on the potential of PPAR $\alpha$  agonists to modulate radiation-induced brain injury. PPAR $\alpha$  has been shown to play a major role in regulating inflammatory processes. In vitro, PPAR $\alpha$  agonists inhibit pro-inflammatory responses in a variety of cell types, including microglia and astrocytes,<sup>66</sup> and confer neuroprotection in several preclinical models, including

stroke and Parkinson's disease.<sup>63</sup> Initial studies demonstrated that pretreating murine microglia (BV-2) cells with PPAR $\alpha$  agonists prevented the radiation-induced pro-inflammatory response via negative regulation of NF- $\kappa$ B and AP-1 pathways.<sup>67</sup> Subsequent in vivo studies have used the selective PPAR $\alpha$  agonist fenofibrate based on, (i) its ability to cross the blood-brain barrier (BBB), (ii) it is clinically approved for the treatment of hyperlipidemia,<sup>68</sup> and (iii) it is well tolerated. Administering fenofibrate (0.2% w/w) to the diet of young adult male mice receiving WBI (10 Gy single dose) both prevented the radiation-induced decrease in the number of newborn hippocampal neurons and inhibited microglial activation.<sup>69</sup> However, the 129Sv strain of mice used in these studies exhibit defects in the corpus callosum and perform poorly in cognitive function tasks, preventing assessment of radiation-induced cognitive impairment. The ability of fenofibrate to modulate radiation-induced cognitive impairment has been assessed in young adult male rats following fWBI (Greene-Schloesser, unpublished data). Young adult male rats received fenofibrate (0.2% w/w) in their diet starting 1 week prior to and



continuously until the end of the study at 30 weeks after fWBI. Fenofibrate prevented the reduction in perirhinal cortex-dependent cognitive function assessed 26 weeks after fWBI (Fig. 2B) and the increase in activated microglia determined 30 weeks after fWBI (Greene-Schloesser, unpublished data). This preservation of cognitive function was seen in the absence of any protection in terms of neurogenesis, further supporting the need to consider other regions than the hippocampus alone when studying radiation-induced cognitive impairment (Greene-Schloesser, unpublished data). Given that PPAR $\alpha$  agonists, including fenofibrate, are increasingly recognized as potent antitumor agents,<sup>70</sup> they appear to be promising drugs in improving the QOL of patients with brain cancer who are receiving radiotherapy.

### RAS Blockers

One of the most effective approaches in the prevention/amelioration of radiation-induced late effects has been blockade of the RAS. Angiotensin-converting enzyme inhibitors (ACEI) or angiotensin II type 1 receptor blockers (ARB) have proved to be highly effective in the treatment and prevention of experimental late effects in the kidney and lung.<sup>71</sup> The RAS has been classically viewed as a complex systemic hormonal system. More recently, several intra-organ RAS have been identified, including a brain RAS.<sup>72</sup> The brain RAS is involved in modulation of the BBB, stress, memory, and cognition.<sup>73,74</sup> Moreover, beneficial effects of RAS blockade on cognition have been observed; ACEI attenuate the age-related decline in cognitive function in spontaneously hypertensive and normotensive rats<sup>75,76</sup> and the ARB, losartan, improves cognitive function in hypertensive patients, independent of any reduction in blood flow.<sup>77</sup> These findings suggest an important role for the brain RAS in normal cognitive function and potential treatment of dysfunctional memory disease states.<sup>78</sup> On the basis of these findings, the use of RAS blockers in the treatment of radiation-induced brain injury, including cognitive impairment, appears to be logical.<sup>79</sup>

Using a recently established rat model of radiation-induced injury to the optic nerve, Kim et al were the first to demonstrate ACEI-mediated neuroprotection against late radiation-induced brain injury.<sup>80</sup> Chronic administration of the ACEI ramipril, which can cross the BBB, to young adult male rats 2 weeks after stereotactic irradiation of the rat brain with a single dose of 30 Gy was associated with a reduction in the severity of functional and histopathologic markers of optic neuropathy assessed 6 months after irradiation.<sup>80</sup> However, delaying the start of ramipril treatment to 4 weeks after irradiation resulted in a failure to reduce the severity of the radiation injury.<sup>81</sup> More recent findings do support a role for RAS blockers in protecting against radiation-induced cognitive impairment. Administration of the ARB L-158,809 (20 mg/L drinking water) to young adult male rats for 3 days before, during, and for 28 or 54 weeks after fWBI prevented the radiation-induced cognitive impairment

observed 26 and 52 weeks after irradiation (Fig. 2C).<sup>82</sup> Continued RAS blockade may not be required. Giving L-158,809 before, during, and for only 5 weeks after irradiation prevented the cognitive impairment observed 26 weeks after irradiation.<sup>82</sup> Lee et al have extended these observations to show that RAS blockade using the ACEI ramipril can similarly prevent fWBI-induced cognitive impairment.<sup>37</sup> Administering ramipril (15 mg/L) in the drinking water starting 3 days before, during, and for 28 weeks after fWBI of young adult male rats prevented the radiation-induced decrease in cognitive function observed 26 weeks after irradiation (Fig. 2D).<sup>37</sup> Thus, RAS blockade with either ACEI or ARB appears to be effective at preventing radiation-induced cognitive impairment. However, the mechanisms involved remain unclear.

Conner et al tested whether the cognitive benefits of L-158,809 were associated with amelioration of the sustained neuroinflammation and changes in neurogenesis resulting from fWBI.<sup>53</sup> In rats examined at 28 and 54 weeks after fWBI, L-158,809 treatment did not alter the effects of radiation on the number and activation of microglia in the perirhinal cortex and hippocampus, nor did it prevent the radiation-induced decrease in proliferating cells and immature neurons in the hippocampus.<sup>53</sup> In contrast, analysis of radiation-induced changes in the number of total and activated microglia in the hippocampus of F344 rats treated with fWBI with or without ramipril indicate that the ramipril-mediated prevention of the radiation-induced cognitive impairment is associated with prevention of the radiation-induced activation of microglia 28 weeks after irradiation.<sup>37</sup> It is unclear whether this difference in the ability of L-158,809 and ramipril to modulate radiation-induced neuroinflammation represents differences in specific biological mechanisms and/or signaling pathways. Nevertheless, these findings clearly indicate that the development of radiation-induced cognitive impairment involves multiple brain regions, is not solely dependent on reductions in hippocampal neurogenesis and/or microglial activation, and can be modulated by RAS blockers.

As discussed with the PPAR agonists, the ability to translate these findings to the clinic is predicated by ensuring that the protective effect of RAS blockers on the normal brain is selective and not observed in tumor cells. A growing body of evidence suggests that ACEI and ARB exhibit antitumor effects, including inhibition of angiogenesis and proliferation,<sup>83</sup> and can enhance anticancer therapies.<sup>84</sup> Thus, given that RAS blockers are routinely prescribed for treatment of hypertension<sup>85</sup> and well-tolerated, they appear to be ideal drugs for translational clinical studies.

### Translation of Therapeutics to the Clinic

Although the precise mechanisms involved in the development and progression of radiation-induced cognitive impairment remain ill-defined, it is clear that several agents, all of which are routinely used in the clinic for

a variety of chronic disorders, can prevent this late effect in preclinical models. Given that these agents are well-tolerated and have been shown to possess anti-tumor properties, they appear to be attractive translational agents. Indeed, a phase I/II trial of pioglitazone given to patients with brain tumor before, during, and after fWBI is currently under way at Wake Forest Baptist Medical Center, and phase I/II trials of the ACEI ramipril and also an ARB are being developed. A clinical trial of aerobic exercise to promote hippocampal neurogenesis after cranial irradiation is ongoing at University of Toronto/Sick Kids. Although it is simplistic to think that one approach or one pharmacological intervention will eliminate radiation-induced cognitive impairment for every patient whose brain is treated with ionizing radiation, it is highly likely that significant inroads will be made to prevent/ameliorate this increasingly important adverse effect of brain irradiation over the next decade.

## Summary

Recent improvements in systemic treatments and radiation therapy techniques have resulted in >100 000 patients in the United States each year surviving long enough after fWBI to develop radiation-induced brain injury, including cognitive impairment that significantly affects their QOL. Although modern radiation therapy techniques have eliminated many cases of acute and early delayed brain injury and most late demyelination and white matter necrosis, functional deficits, including progressive impairments in memory, attention, and executive function have become important, having profound effects on QOL of most survivors.

Preclinical studies have provided valuable insights into the pathogenesis of radiation-induced brain injury, including cognitive impairment. Although reductions in hippocampal neurogenesis and hippocampal-dependent cognitive function have been observed in rodent models, it is important to recognize that other brain regions are affected; non-hippocampal-dependent reductions in cognitive function occur. Treatment using stem cell therapies suggest that the radiation-induced reduction in neurogenesis can be prevented. However, the use of stem cell-based therapies to prevent/ameliorate radiation-induced cognitive impairment in humans will require considerably more research before it can be translated to the clinic.

In contrast, preclinical studies using PPAR agonists and RAS blockers, clinically approved and well-tolerated agents used in the treatment of type II diabetes, hyperlipidemia, and hypertension, have demonstrated that these drugs can prevent/ameliorate radiation-induced cognitive impairment independent of changes in neurogenesis. Translating these exciting preclinical findings to the clinic offers the promise of significantly improving the QOL of patients with brain tumor who receive radiation therapy.

## Funding

This work was supported by the National Cancer Institute of the National Institutes of Health (CA112593; CA122318; CA113267 to MER).

*Conflict of interest statement.* None declared.

## References

- Schultheiss TE, Stephens LC. Permanent radiation myelopathy. *Br J Radiol.* 1992;65:737–753.
- Calvo W, Hopewell JW, Reinhold HS, Yeung TK. Time- and dose-related changes in the white matter of the rat brain after single doses of X rays. *Br J Radiol.* 1988;61:1043–1052.
- van den Maazen RWM, Kleiboer BJ, Berhagen I, van der Kogel AJ. Repair capacity of adult rat glial progenitor cells determined by an *in vitro* clonogenic assay after *in vitro* or *in vivo* fractionated irradiation. *Int J Radiat Biol.* 1993;63:661–666.
- Crossen JR, Garwood D, Glatstein E, Neuwelt EA. Neurobehavioral sequelae of cranial irradiation in adults: a review of radiation-induced encephalopathy. *J Clin Oncol.* 1994;12:627–642.
- Giovagnoli AR, Boiardi A. Cognitive impairment and quality of life in long-term survivors of malignant brain tumors. *Ital J Neurol Sci.* 1994;15:481–488.
- Johannessen TB, Lien HH, Hole KH, Lote K. Radiological and clinical assessment of long-term brain tumour survivors after radiotherapy. *Radiother Oncol.* 2003;69:169–176.
- Meyers CA, Brown PD. Role and Relevance of Neurocognitive Assessment in Clinical Trials of Patients With CNS Tumors. *J Clin Oncol.* 2006;24:1305–1309.
- Stupp R, Mason WP, van den Bent MJ, et al. Radiotherapy plus concomitant and adjuvant temozolomide for glioblastoma. *N Engl J Med.* 2005;352:987–996.
- Cochran DC, Chan MD, Aklilu M, et al. The effect of targeted agents on outcomes in patients with brain metastases from renal cell carcinoma treated with Gamma Knife surgery. *J Neurosurg.* 2012;116:978–83.
- Hochberg FH, Slotnick B. Neuropsychologic impairment in astrocytoma survivors. *Neurology.* 1980;30:172.
- Twijnstra A, Boon PJ, Lormans AC, ten Velde GP. Neurotoxicity of prophylactic cranial irradiation in patients with small cell carcinoma of the lung. *Eur J Cancer Clin Oncol.* 1987;23:983–986.
- Laukkanen E, Klonooff H, Allan B, Graeb D, Murray N. The role of prophylactic brain irradiation in limited stage small cell lung cancer: clinical, neuropsychologic, and CT sequelae. *Int J Radiat Oncol Biol Phys.* 1988;14:1109–1117.
- Roman DD, Sperduto PW. Neuropsychological effects of cranial radiation: current knowledge and future directions. *Int J Radiat Oncol Biol Phys.* 1995;31:983–998.
- Nieder C, Leicht A, Motaref B, Nestle U, Niewald M, Schnabel K. Late radiation toxicity after whole brain radiotherapy: the influence of anti-epileptic drugs. *Am J Clin Oncol.* 1999;22:573–579.

15. DeAngelis LM, Delattre J-Y, Posner JB. Radiation-induced dementia in patients cured of brain metastases. *Neurology*. 1989;39:789–795.
16. Vigliani MC, Duyckaerts C, Hauw JJ, Poisson M, Magdelenat H, Delattre JY. Dementia following treatment of brain tumors with radiotherapy administered alone or in combination with nitrosourea-based chemotherapy: a clinical and pathological study. *J Neurooncol*. 1999;41:137–149.
17. Dropcho EJ. Central nervous system injury by therapeutic irradiation. *Neurol Clin*. 1991;9:969–988.
18. Shaw EG, Robbins ME. The management of radiation-induced brain injury. *Cancer Treat Res*. 2006;128:7–22.
19. Liu R, Page M, Solheim K, Fox S, Chang SM. Quality of life in adults with brain tumors: Current knowledge and future directions. *J Neurooncol*. 2009;11:330–339.
20. Shaw EG, Rosdhal R, D'Agostino RB, Jr., et al. Phase II study of donepezil in irradiated brain tumor patients: effect on cognitive function, mood, and quality of life. *J Clin Oncol*. 2006;24:1415–1420.
21. Zhao W, Robbins ME. Inflammation and chronic oxidative stress in radiation-induced late normal tissue injury: therapeutic implications. *Curr Med Chem*. 2009;16:130–143.
22. Tofilon PJ, Fike JR. The radioresponse of the central nervous system: a dynamic process. *Radiat Res*. 2000;153:357–370.
23. Eichenbaum H. Hippocampus: cognitive processes and neural representations that underlie declarative memory. *Neuron*. 2004;44:109–120.
24. Eichenbaum H. The hippocampus and declarative memory: cognitive mechanisms and neural codes. *Behav Brain Res*. 2001;127:199–207.
25. Palmer TD, Takahashi J, Gage FH. The adult rat hippocampus contains primordial neural stem cells. *Mol Cell Neurosci*. 1997;8:389–404.
26. Gage FH, Kempermann G, Palmer TD, Peterson DA, Ray J. Multipotent progenitor cells in the adult dentate gyrus. *J Neurobiol*. 1998;36:249–266.
27. Eriksson PS, Perfilieva E, Bjork-Eriksson T, et al. Neurogenesis in the adult human hippocampus. *Nat Med*. 1998;4:1313–1317.
28. Palmer TD, Willhoite AR, Gage FH. Vascular niche for adult hippocampal neurogenesis. *J Comp Neurol*. 2000;425:479–494.
29. Song H, Stevens CF, Gage FH. Astroglia induce neurogenesis from adult neural stem cells. *Nature*. 2002;417:39–44.
30. Bellinzona M, Gobbel GT, Shinohara C, Fike JR. Apoptosis is induced in the subependyma of young adult rats by ionizing irradiation. *Neurosci Lett*. 1996;208:163–166.
31. Snyder JS, Kee N, Wojtowicz JM. Effects of adult neurogenesis on synaptic plasticity in the rat dentate gyrus. *J Neurophys*. 2001;85:2423–2431.
32. Monje ML, Mizumatsu S, Fike JR, Palmer TD. Irradiation induces neural precursor-cell dysfunction. *Nat Med*. 2002;8:955–962.
33. Mizumatsu S, Monje ML, Morhardt DR, Rola R, Palmer TD, Fike JR. Extreme sensitivity of adult neurogenesis to low doses of X-irradiation. *Cancer Res*. 2003;63:4021–4027.
34. Monje ML, Vogel H, Masek M, Ligon KL, Fisher PG, Palmer TD. Impaired human hippocampal neurogenesis after treatment for central nervous system malignancies. *Ann Neurol*. 2007;62:515–520.
35. Rola R, Raber J, Rizk A, et al. Radiation-induced impairment of hippocampal neurogenesis is associated with cognitive deficits in young mice. *Exp Neurol*. 2004;188:316–330.
36. Raber J, Rola R, LeFevour A, et al. Radiation-induced cognitive impairments are associated with changes in indicators of hippocampal neurogenesis. *Radiat Res*. 2004;162:39–47.
37. Lee TC, Greene-Schloesser DM, Payne V, Diz DI, et al. Chronic administration of the ACE inhibitor, ramipril, prevents fractionated whole-brain irradiation-induced perirhinal cortex dependent cognitive impairment. *Radiat Res*. 2012;178:46–56.
38. Yoneoka Y, Satoh M, Akiyama K, Sano K, Fujii Y, Tanaka R. An experimental study of radiation-induced cognitive dysfunction in an adult rat model. *Br J Radiol*. 1999;72:1196–1201.
39. Shi L, Adams MM, Long A, et al. Spatial learning and memory deficits after whole-brain irradiation are associated with changes in NMDA receptor subunits in the hippocampus. *Radiat Res*. 2006;166:892–899.
40. Schindler MK, Forbes ME, Robbins ME, Riddle DR. Aging-dependent changes in the radiation response of the adult rat brain. *Int J Radiat Oncol Biol Phys*. 2008;70:826–834.
41. Lamprogrou I, Chen QM, Boisserie G, et al. Radiation-induced cognitive dysfunction: an experimental model in the old rat. *Int J Radiat Oncol Biol Phys*. 1995;31:65–70.
42. Brown WR, Thore CR, Moody DM, Robbins ME, Wheeler KT. Vascular damage after fractionated whole-brain irradiation in rats. *Radiat Res*. 2005;164:662–668.
43. Atwood T, Payne VS, Zhao W, et al. Quantitative magnetic resonance spectroscopy reveals a potential relationship between radiation-induced changes in rat brain metabolites and cognitive impairment. *Radiat Res*. 2007;168:574–581.
44. Gebicke-Haerter PJ. Microglia in neurodegeneration: molecular aspects. *Microsc Res Tech*. 2001;54:47–58.
45. Monje ML, Toda H, Palmer TD. Inflammatory blockade restores neurogenesis. *Science*. 2003;302:1760–1765.
46. Rosi S, Andres-Mach M, Fishman KM, Levy W, Ferguson RA, Fike JR. Cranial irradiation alters the behaviorally induced immediate-early gene arc (activity-regulated cytoskeleton-associated protein). *Cancer Res*. 2008;68:9763–9770.
47. Zhao W, Diz DI, Robbins ME. Oxidative damage pathways in relation to normal tissue injury. *Br J Radiol*. 2007;80:S23–S31.
48. Robbins MEC, Zhao W. Chronic oxidative stress and radiation-induced late normal tissue injury: a review. *Int J Radiat Biol*. 2004;80:251–259.
49. Dent P, Yacoub A, Fisher PB, Hagan MP, Grant S. MAPK pathways in radiation responses. *Oncogene*. 2003;22:5885–5896.
50. Hong JH, Chiang CS, Campbell IL, Sun JR, Withers HR, McBride WH. Induction of acute phase gene expression by brain irradiation. *Int J Radiat Oncol Biol Phys*. 1995;33:619–626.
51. Lee WH, Sonntag WE, Mitschelen M, Yan H, Lee YW. Irradiation induces regionally specific alterations in pro-inflammatory environments in rat brain. *Int J Radiat Biol*. 2010;86:132–144.
52. Rola R, Sarkissian V, Obenaus A, et al. High-LET radiation induces inflammation and persistent changes in markers of hippocampal neurogenesis. *Radiat Res*. 2005;164:556–560.
53. Conner KR, Payne VS, Forbes ME, Robbins ME, Riddle DR. Effects of the AT1 receptor antagonist L-158,809 on microglia and neurogenesis after fractionated whole-brain irradiation. *Radiat Res*. 2010;173:49–61.
54. Naylor AS, Bull C, Nilsson MKL, et al. From the Cover: Voluntary running rescues adult hippocampal neurogenesis after irradiation of the young mouse brain. *PNAS*. 2008;105:14632–14637.
55. Wong-Goodrich SJE, Pfau ML, Flores CT, Fraser JA, Williams CL, Jones LW. Voluntary running prevents progressive memory decline and increases adult hippocampal neurogenesis and growth factor expression after whole-brain irradiation. *Cancer Res*. 2010;70:9329–9338.
56. Acharya MM, Christie LA, Lan ML, et al. Human neural stem cell transplantation ameliorates radiation-induced cognitive dysfunction. *Cancer Res*. 2011;71:4834–4845.

57. Acharya MM, Christie LA, Lan ML, et al. Rescue of radiation-induced cognitive impairment through cranial transplantation of human embryonic stem cells. *PNAS*. 2009;106:19150–19155.
58. Blumberg B, Evans RM. Orphan nuclear receptors-new ligands and new possibilities. *Genes Dev*. 1998;12:3149–3155.
59. Bright JJ, Kanakasabai S, Chearwae W, Chakraborty S. PPAR regulation of inflammatory signaling in CNS diseases. *PPAR Res*. 2008;2008:658520.
60. Stahel PF, Smith WR, Bruchis J, Rabb CH. Peroxisome proliferator-activated receptors: “Key” regulators of neuroinflammation after traumatic brain injury. *PPAR Res*. 2008;2008:538141.
61. Ramanan S, Zhao W, Riddle DR, Robbins ME. Role of PPARs in Radiation-Induced Brain Injury. *PPAR Res*. 2010;2010:234975.
62. Derosa G. Efficacy and tolerability of pioglitazone in patients with type 2 diabetes mellitus: comparison with other oral antihyperglycaemic agents. *Drugs*. 2010;70:1945–1961.
63. Bordet R, Ouk T, Petraut O, et al. PPAR: a new pharmacological target for neuroprotection in stroke and neurodegenerative diseases. *Biochem Soc Trans*. 2006;34:1341–1346.
64. Zhao W, Payne V, Tommasi E, Diz DI, Hsu F-C, Robbins ME. Administration of the peroxisomal proliferator-activated receptor (PPAR) $\gamma$  agonist pioglitazone during fractionated brain irradiation prevents radiation-induced cognitive impairment. *Int J Radiat Oncol Biol Phys*. 2007;67:6–9.
65. Grommes C, Landreth GE, Heneka MT. Antineoplastic effects of peroxisome proliferator-activated receptor gamma agonists. *Lancet Oncol*. 2004;5:419–429.
66. Drew PD, Xu J, Storer PD, Chavis JA, Racke MK. Peroxisome proliferator-activated receptor agonist regulation of glial activation: relevance to CNS inflammatory disorders. *Neurochem Int*. 2006;49:183–189.
67. Ramanan S, Kooshki M, Zhao W, Hsu FC, Robbins ME. PPAR $\alpha$  ligands inhibit radiation-induced microglial inflammatory responses by negatively regulating NF-kappaB and AP-1 pathways. *Free Radic Biol Med*. 2008;45:1695–1704.
68. McKeage K, Keating GM. Fenofibrate: a review of its use in dyslipidaemia. *Drugs*. 2011;71:1917–1946.
69. Ramanan S, Kooshki M, Zhao W, Hsu FC, Riddle DR, Robbins ME. The PPAR $\alpha$  agonist fenofibrate preserves hippocampal neurogenesis and inhibits microglial activation after whole-brain irradiation. *Int J Radiat Oncol Biol Phys*. 2009;75:870–877.
70. Panigrahy D, Kaipainen A, Huang S, et al. PPAR $\alpha$  agonist fenofibrate suppresses tumor growth through direct and indirect angiogenesis inhibition. *PNAS*. 2008;105:985–990.
71. Moulder JE, Fish BL, Cohen EP. Treatment of radiation nephropathy with ACE inhibitors and All type-1 and type-2 receptor antagonists. *Curr Pharm Des*. 2007;13:1317–1325.
72. Davissou RL. Physiological genomic analysis of the brain renin-angiotensin system. *Am J Physiol Regul Integr Comp Physiol*. 2003;285:R498–R511.
73. Gard PR. The role of angiotensin II in cognition and behaviour. *Eur J Pharmacol*. 2002;438:1–14.
74. McKinley MJ, Albiston AL, Allen AM, et al. The brain renin-angiotensin system: location and physiological roles. *Int J Biochem Cell Biol*. 2003;35:901–918.
75. Basso N, Paglia N, Stella I, et al. Protective effect of the inhibition of the renin-angiotensin system on aging. *Regul Pept*. 2005;128:247–252.
76. Wyss JM, Kadish I, van Groen T. Age-related decline in spatial learning and memory: attenuation by captopril. *Clin Exp Hypertens*. 2003;25:455–474.
77. Tedesco MA, Ratti G, Di Salvo G, Natale F. Does the angiotensin II receptor antagonist losartan improve cognitive function? *Drugs Aging*. 2002;19:723–732.
78. Wright JW, Harding JW. The brain angiotensin system and extracellular matrix molecules in neuralplasticity, learning, and memory. *Prog Neurobiol*. 2004;72:263–293.
79. Robbins ME, Zhao W, Garcia-Espinosa MA, Diz DI. Renin-angiotensin system blockers and modulation of radiation-induced brain injury. *Curr Drug Targets*. 2010;11:1413–1422.
80. Kim JH, Brown SL, Kolozsvary A, et al. Modification of radiation injury by ramipril, inhibitor of angiotensin-converting enzyme, on optic neuropathy in the rat. *Radiat Res*. 2004;161:137–142.
81. Ryu S, Kolozsvary A, Jenrow KA, Brown SL, Kim JH. Mitigation of radiation-induced optic neuropathy in rats by ACE inhibitor ramipril: importance of ramipril dose and treatment time. *J Neurooncol*. 2007;82:119–124.
82. Robbins ME, Payne V, Tommasi E, et al. The AT1 receptor antagonist, L-158,809, prevents or ameliorates fractionated whole-brain irradiation-induced cognitive impairment. *Int J Radiat Oncol Biol Phys*. 2009;73:499–505.
83. Moltani A, Ward WF, Ts’ao CH, et al. Cytostatic properties of some angiotensin I converting enzyme inhibitors and of angiotensin II type I receptor antagonists. *Curr Pharm Des*. 2003;9:751–761.
84. George AJ, Thomas WG, Hannan RD. The renin-angiotensin system and cancer: old dog, new tricks. *Nat Rev Cancer*. 2010;10:745–759.
85. Ribeiro AB. Angiotensin II antagonists—therapeutic benefits spanning the cardiovascular disease continuum from hypertension to heart failure and diabetic nephropathy. *Curr Med Res Opin*. 2006;22:1–16.
